# Differential Proteomics and Functional Research following Gene Therapy in a Mouse Model of Leber Congenital Amaurosis

Qinxiang Zheng<sup>1</sup>, Yueping Ren<sup>1</sup>, Radouil Tzekov<sup>2</sup>, Yuanping Zhang<sup>3</sup>, Bo Chen<sup>4</sup>, Jiangping Hou<sup>1</sup>, Chunhui Zhao<sup>1</sup>, Jiali Zhu<sup>1</sup>, Ying Zhang<sup>1</sup>, Xufeng Dai<sup>1</sup>, Shan Ma<sup>5</sup>, Jia Li<sup>5</sup>, Jijing Pang<sup>1,6</sup>, Jia Qu<sup>1\*</sup>, Wensheng Li<sup>1,7\*</sup>

**1** Eye Hospital, Wenzhou Medical College, Wenzhou, China, **2** The Roskamp Institute, Sarasota, Florida, United States of America, **3** Department of Ophthalmology, The Second Affiliated Hospital of Kunming Medical College, Kunming, China, **4** Department of Ophthalmology and Visual Science, Yale University School of Medicine, New Haven, Connecticut, United States of America, **5** Department of Ophthalmology, University of Massachusetts Medical School, Worcester, Massachusetts, United States of America, **6** Department of Ophthalmology, College of Medicine, University of Florida, Gainesville, Florida, United States of America, **7** Neurobiology-Neurodegeneration and Repair Laboratory, Retinal Cell Biology and Degeneration Section, National Eye Institute, National Institutes of Health, Bethesda, Maryland, United States of America

## Abstract

Leber congenital amaurosis (LCA) is one of the most severe forms of inherited retinal degeneration and can be caused by mutations in at least 15 different genes. To clarify the proteomic differences in LCA eyes, a cohort of retinal degeneration 12 (*rd12*) mice, an LCA2 model caused by a mutation in the *RPE65* gene, were injected subretinally with an AAV vector (scAAV5-smCBA-hRPE65) in one eye, while the contralateral eye served as a control. Proteomics were compared between untreated *rd12* and normal control retinas on P14 and P21, and among treated and untreated *rd12* retinas and control retinas on P42. Gene therapy in *rd12* mice restored retinal function in treated eyes, which was demonstrated by electroretinography (ERG). Proteomic analysis successfully identified 39 proteins expressed differently among the 3 groups. The expression of 3 proteins involved in regulation of apoptosis and neuroprotection (alpha A crystallin, heat shock protein 70 and peroxiredoxin 6) were investigated further. Immunofluorescence, Western blot and real-time PCR confirmed the quantitative changes in their expression. Furthermore, cell culture studies suggested that peroxiredoxin 6 could act in an antioxidant role in *rd12* mice. Our findings support the feasibility of gene therapy in LCA2 patients and support a role for alpha A crystallin, heat shock protein 70 and peroxiredoxin 6 in the pathogenetic mechanisms involved in LCA2 disease process.

**Citation:** Zheng Q, Ren Y, Tzekov R, Zhang Y, Chen B, et al. (2012) Differential Proteomics and Functional Research following Gene Therapy in a Mouse Model of Leber Congenital Amaurosis. PLoS ONE 7(8): e44855. doi:10.1371/journal.pone.0044855

**Editor:** Andreas Ohlmann, University of Regensburg, Germany

**Received:** June 19, 2012; **Accepted:** August 8, 2012; **Published:** August 31, 2012

**Copyright:** © 2012 Zheng et al. This is an open-access article distributed under the terms of the Creative Commons Attribution License, which permits unrestricted use, distribution, and reproduction in any medium, provided the original author and source are credited.

**Funding:** This research was supported by grants of Major Projects of the National Science and Technology of China (No: 2009ZX09503), Specialized Research Fund for the Doctoral Program of Higher Education (No: 20103321110002), Key Projects of National High-Tech R&D Program (863 Program) of China (No: 2007AA021004), retinal gene therapy study grants from Eye Hospital, School of Ophthalmology & Optometry, Wenzhou Medical College, Wenzhou, China. The funders had no role in study design, data collection and analysis, decision to publish, or preparation of the manuscript.

**Competing Interests:** The authors have declared that no competing interests exist.

\* E-mail: jqu@wzmc.net (JQ); drlws@163.net (WL)

## Introduction

Leber congenital amaurosis (LCA) is an inherited retinal degenerative disorder characterized by severe loss of vision at early age. Affecting around 1 in 80,000 of the population, comprising 5% of the total inherited retinal degenerative diseases, LCA is the major cause leading to binocular blindness in children (10%~20%) [1], [2]. Besides visual impairment from infancy, LCA is also typically characterized by nystagmus, sluggish or no pupillary responses and, low or even non-recordable electroretinogram (ERG) amplitude. LCA is regarded as an autosomal recessive disease, although some autosomal dominant cases were also reported [3], [4]. LCA has been linked to at least fifteen genes, which are *AIP1*, *CRB1*, *CRX*, *GUCY2D*, *LRAT*, *TULP1*, *RPE65*, *RPGRI1*, *CEP290*, *RDH12*, *LCA5*, *TULP1*, *RD3*, *IMPDH1* and *SPATA7* (RetNet: <http://www.sph.uth.tmc.edu>) [5]. About 16% of all LCA cases are caused by mutations of *RPE65* gene [6], which is mainly expressed in retinal pigment epithelium (RPE) [7]. *RPE65*

is an isomerohydrolase in the canonical retinoid visual cycle, which is the enzymatic pathway that regenerates photoreceptor chromophore 11-*cis*-retinal after it is bleached in the process of light perception [8]. Studies in knockout mice (*RPE65*  $-/-$ ) demonstrated that the lack of *RPE65* protein does not allow a physiological recovery of 11-*cis*-retinal and rods and cones degenerate quickly after birth, probably because of the constitutive opsin signaling [9], while administration of 9-*cis* or 11-*cis*-retinal could partially restore both rod and cone function [10]. To date, the most successful example of experimental gene therapy for an ocular disease is the gene delivery of *RPE65* gene in LCA mice and patients [11]. rAAV-vector-mediated *RPE65* gene replacement has rescued morphological, biochemical and electrophysiological abnormalities present in murine models with *RPE65* deficiency [12], [13]. More importantly, several groups have reported rescue of vision after rAAV-vector-mediated gene replacement in the Swedish Briard dog, a spontaneous *RPE65*-null model [14–17],

where stable vision improvement has been maintained over 8 years after a single rAAV vector administration [18], [19]. These results, in addition to the absence of side effects after rAAV vector subretinal delivery in non-human primates [20], have paved the way to ongoing clinical trials using rAAV2/2 vectors for *RPE65* gene replacement in patients affected by LCA due to *RPE65* mutations [21–24]. This form of LCA is particularly suitable for gene therapy because *RPE65* patients have a relatively preserved retinal morphology, despite severe and early vision impairment [25]. The clinical trial results in 15 children and adults followed up to 3 years are indeed promising and constitute the first successful example of gene therapy for inherited ocular diseases [26].

Meanwhile, very little is known about protein changes after gene therapy in retinal disorders. Lai et al. [27] and Bencicelli et al. [16] reported *RPE65* protein expression after the administration of a AAV2-RPE65 gene. Pawlyk et al. showed that subretinal injection of recombinant AAV vector packaged with a *RPGRIP* expression cassette into the *RPGRIP*<sup>-/-</sup> mouse eye, led to normal *RPGRIP* expression and localization [28]. Kostic et al. found that subretinal injection of a lentiviral vector driving expression of *RPE65* in *RPE65* deficient (R91W/R91W) mice, not only slowed down the cone degeneration, but also restored the cone-specific protein expression [29].

However, to the best of our knowledge, a study on the totality of protein expression before and after gene intervention has not been reported. Using the technique of two-dimensional electrophoresis (2-DE) and mass spectrometry, the present study analyzed retinal proteomic differences after subretinal injection of scAAV5-smCBA-hRPE65 in *rd12* mice, screened the proteins relevant to the retinal degeneration progression for further verification, and conducted cell culture experiments to test the important role of selected proteins, aiming to clarify the role of regulating factors in photoreceptor apoptosis and possible retinal protective factors for LCA and other related retinal degenerative disorders.

## Materials and Methods

### Gene therapy

Sixty mice of *rd12* (*Rpe65rd12*, or B6(A)-*Rpe65rd12/J*) mice were obtained from the Jackson Laboratory (Bar Harbor, ME), and 42 age-matched C57BL/6J mice were obtained from Animal Center of Wenzhou Medical College. All mice were bred and maintained in the Animal Facilities of Wenzhou Medical College (SPF). They were kept in a 12-hour light 12-hour dark cycle with an ambient light intensity of 18 lux and with free access to food and water. All experiments were approved by the Wenzhou Medical College's Institutional Review Board and were conducted in accordance with the ARVO Statement for the Use of Animals in Ophthalmic and Vision Research. Three groups were assigned in the experiment: the treated right eyes of *rd12* mice were treated *rd12* group, the contralateral untreated left eyes were untreated *rd12* group and the age-matched wide-type C57BL/6J mice were the normal control group. The same scAAV5-smCBA-hRPE65 vector as we used in the previous studies in our lab was used in this experiment [30]. Subretinal injections were also performed with the previously described methods [12]. After pupil dilation and general anesthesia, animals were prepared for treatment. A small incision within the pupil area was made through the nasal cornea with a 30.5-gauge disposable needle. A 33-gauge, unbeveled, blunt needle mounted on a 5- $\mu$ L syringe (Hamilton Co., Reno, NV) was introduced through the corneal opening, avoiding the lens and penetrating the neuroretina to reach the subretinal space in the inferior central region. One microliter of vector suspension ( $1 \times 10^{13}$  genome containing particles/mL) containing 1% fluores-

cein was injected slowly into the subretinal space of the right eye. Injections were always performed in the right eye, leaving the uninjected left eye as a control. The injected retinal area was visualized by fluorescein positive subretinal blebs demarcating the retinal detachment. After the injection procedure, 1% atropine eye drops and 0.3% tobramycin-dexamethasone eye ointment (Alcon Laboratories Inc., Fort Worth, TX) were given 3 times each day for 3 days. Only injected mice that had more than 95% retinal detachment after the subretinal injection and with minimal complications were kept for further evaluation. Animals with any of the following serious surgical complications, including iris-cornea adhesion, iris or retinal hemorrhage, and damage to the lens which could cause cataract formation, were excluded from the experiment. The contralateral untreated *rd12* eyes and the age-matched normal C57BL/6J eyes were used as controls.

### Electroretinograms

Scotopic and photopic ERGs of the 3 groups at age P14, P21 and P42 were recorded as published previously [30]. Briefly, full-field ERGs were recorded with a custom-built Ganzfeld dome connected to a computer based system (Q450SC UV; Roland Consult, Wiesbaden, Germany). LED stimuli of 6 intensities ranging from  $-35$ ,  $-25$ ,  $-15$ ,  $-5$ ,  $5$  to  $15$   $\text{cd}\cdot\text{s}/\text{m}^2$ , were used under scotopic conditions. White LED stimuli of two intensities ( $1$   $\text{cd}\cdot\text{s}/\text{m}^2$ ,  $1.96$   $\text{cd}\cdot\text{s}/\text{m}^2$ ) were used to generate and record cone responses under photopic conditions, with a background white light at  $30$   $\text{cd}/\text{m}^2$ . The signal was amplified 1000-fold and bandpass filtered between 1 and 100 Hz. After dark adaptation overnight, scotopic ERG was recorded between 8AM to 11AM, which was followed by photopic ERG. Recordings were done at age P14, P21 and P42. All testing was performed in a climate-controlled, electrically isolated dark room under dim red light illumination. Systemic anesthesia was achieved by the intraperitoneal administration of a mixture of ketamine (72 mg/kg) and xylazine (4 mg/kg), while cornea was anesthetized by a drop of 0.5% proparacaine hydrochloride, and pupils dilated with 1% atropine and 2.5% phenylephrine hydrochloride. Small amount of 2.5% methylcellulose gel was applied to the eye, and a special Ag/AgCl wire loop electrode was placed over the cornea as an active electrode. Needle reference and ground electrodes were inserted into the cheek and tail, respectively. Recordings were started from the lowest light intensity to the highest. Body temperature was maintained by placing the animals on a 37°C warming pad during the experiment.

### Two-Dimensional Electrophoresis

2-DE was performed as previously described [31]. Briefly, retinas were mechanically dissected from enucleated eyes, homogenated and then mixed with 100  $\mu$ L of lysis buffer (7 M urea, 2 M thiourea, 4 % CHAPS, 2 M TBP, 20 mM Tris, 1% IEF buffer, 1 mM PMSF, 100  $\mu$ g/ml DNase, 100  $\mu$ g/ml RNase), and centrifuged at 15,000 rpm for 1 minutes at 4°C. The protein concentrations for the samples were measured using the Bradford method. Protein samples were resuspended in IEF buffer (7 M urea, 2 M thiourea, 4% CHAPS, 65 mM DTT, 1% IEF buffer and 0.001% bromophenol blue). Equal amount of protein samples from the retina (100  $\mu$ g) was applied to a 17 cm PH 3.0–10.0 2-DE gel. For the first dimension, IEF was performed using the following voltage program: 150 V for 1.5 h, 250 V for 1.5 h, 500 V for 1.5 h, 1000 V for 2 h, 5000 V for 3 h, 7000 V for 2 h, 10000 V for 5 h, 500 V for 20 h. The strip after IEF was equilibrated for 15 min in the equilibrium buffer I including DTT, then for another 15 min in the equilibrium buffer II including iodacetamide. In the second dimension, 13% sodium dodecyl

sulfate (SDS) gels were run at 12 mA per gel 30 min and then 24 mA per gel to the end. The electrophoresis was stopped when the bromophenol blue front had traversed the gel. The completed 2-D gels were stained with silver nitrate. Comparisons on P14, P21 were made between untreated *rd12* and normal control retinas, and those on P42 were among treated and untreated *rd12* retinas and control retinas. Differential protein spots were excised from the gels and destained in 200 mM ammonium bicarbonate/50% acetonitrile (ACN) (1:1). Gel pieces were dried in vacuum and then were digested into peptides using trypsin overnight at 37°C.

### Mass Spectrometry Protein Identification

Preparation and analysis of protein spots for mass spectrometry were performed using a previously described method [31]. Briefly, matrix-assisted laser desorption ionization time-of-flight (MALDI-TOF) was performed to obtain peptide mass fingerprints on a QSTAR XL quadrupole-TOF mass spectrometer (Applied Biosystems Inc., Foster City, CA). Peptide peaks were submitted to Mascot software (Matrix Science Inc., Boston, MA) to obtain initial protein identification. Positive identification was based on a significant Molecular Weight Search (MOWSE) score and that the mass tolerance was less than 50 parts per million. Confirmation of initial identities was obtained by peptide mass sequencing using either MALDI or electrospray ionization (ESI) MS. Peptides analyzed by ESI were separated by liquid chromatography online using QSTAR Pulsar quadrupole TOF (Applied Biosystems Inc.) and ionized as described.

### Immunofluorescence

Frozen sections were prepared from freshly enucleated eyes. Then the sections were briefly washed with 0.01 M phosphate-buffered saline (PBS), the retinas were incubated with 5% normal goat serum (NGS) blocking solution for 1 hour, and then stained with rabbit anti-HSP70 (1:100) or anti-PRDX6 (1:200) or anti-CRYAA (1:200) overnight at 4°C. Antibodies for PRDX6 were from Abcam (Cambridge, MA), and those for HSP70 and CRYAA were from Santa Cruz Biotechnology. After the exposure to primary antibodies, the sections were washed in 0.01 M PBS, DAPI(1:50) was added for 5 minutes, and then the sections were re-washed with PBS. After sealing, sections were photographed with a fluorescence microscope (Axio Imager Z1; Carl Zeiss Meditec, Oberkochen, Germany). Images were taken predominantly from the inferior central retina.

### Western blot

Retinal tissue was washed with cold PBS and subjected to lysis in a lysis buffer (50 mM Tris-Cl, 1 mM EDTA, 20 g/L SDS, 5 mM dithiothreitol, 10 mM phenylmethylsulfonyl fluoride). Then a BCA™ Protein Assay Kit (Pierce Inc., Rockford, IL) was used to test the protein concentration. Equal amounts of protein (20 µg each) and rainbow molecular weight markers (Amersham Pharmacia Biotech, Amersham, UK) were separated by 12% SDS-PAGE, then electrotransferred to nitrocellulose membranes. Membranes were blocked with a buffer containing 5% nonfat milk in PBS with 0.05% Tween 20 for 2 hours and incubated overnight with antibody at 4°C. After a second wash with PBS containing 0.05% Tween 20, the membranes were incubated with peroxidase-conjugated secondary antibodies (Santa Cruz Biotechnology, Santa Cruz, CA) and developed with an enhanced chemiluminescence detection kit (Pierce, Inc.). Glyceraldehyde-3-phosphate dehydrogenase (GAPDH) was used as a loading control. Antibodies for CRYAA, HSP70 and PRDX6 were the same to those used in immunofluorescence.

### Real-time PCR

Total RNA was extracted from retina (Trizol reagent; Invitrogen-Gibco, Grand Island, NY) and 0.2 µg of RNA from each sample was reverse transcribed with M-MLV reverse transcriptase according to the manufacturer's instructions (Promega, Madison, WI). The primers were designed using Primer Express 3.0 software (Applied Biosystems, Inc., Foster City, CA), and the sequences and product length are provided in Table 1. PCRs were performed 7500 Real-Time PCR System (Applied Biosystems), with 2×SYBR® Green PCR Master Mix (Applied Biosystems). The results were normalized to the housekeeping gene GAPDH, with the mRNA levels standardized in every group and condition.

### Reactive Oxygen Species Test

Reactive oxygen species (ROS) test was conducted with fresh specimens. Immediately, the eye was embedded by OCT, then frozen for sections which were made 10 µm in thickness. Then the ROS test was performed using ROS Fluorescein Assay Kit (Genmed, USA), following the kit instructions. Briefly, the sections were washed with precooled cleaning liquid. Then they were treated with preheated stains and kept in humidified incubator at 4°C for 20 minutes. Finally, they were re-washed with cleaning liquid. After mounting, the sections were observed under fluorescence microscope.

### TUNEL Test for Apoptosis

Detection of degraded DNA fragments by Terminal Transferase nick-end-labeling (TUNEL) is a commonly-used method for quantitation of apoptosis. TUNEL Apoptosis Detection Kit (Roche, Switzerland) was used to detect retinal cell apoptosis following the kit instructions. Cryostat sections were incubated in 2% TDT (Roche) in TDT buffer (Roche) and 0.03% fluorescein-dUTP (Roche) for 1 hour at 37°C. After incubation, sections were washed with PBS and stained with nuclear dye 4',6-diamidino-2-phenylindole (DAPI, Sigma) for observation.

### Cell Culture and pLenti6.3-PRDX6-IRES-EGFP Transfection

Moorfields/Institute of Ophthalmology-Müller 1 (MIO-M1) cells were donated by Dr. Limb (Moorfields Eye Hospital, UK). Cells were grown at 37°C in 5% CO<sub>2</sub> in DMEM (MediaTech CellGro, Herndon, VA) with 10% fetal bovine serum, adding 2 mmol L<sup>-1</sup> glutamine and 50 µg/ml gentamicin. PRDX6 was cloned out of human cDNA by PCR (primers: PRDX6-PacI-F CTGTCATTAATTAAGCCACCATGCCCG-GAGGTCTGCTTC and PRDX6-AscI-R TCTACGGCGCGCCTTAAGGCTGGGGTGTGTAGCG). The PCR product and vector pLenti6.3-IRES-EGFP were digested with PacI/AscI and ligated at room temperature for 4 hours. Ligation and orientation were verified by sequence

**Table 1.** Primers for HSP70, PRDX6, CRYAA and β-actin in real-time PCR.

| Genes   | sense primer 5'-3'   | antisense primer 5'-3' | length bp |
|---------|----------------------|------------------------|-----------|
| HSP70   | TGGTGCTGACGAAGATGAAG | AGGTCGAAGATGAGCACGTT   | 253       |
| PRDX6   | CGCCAGAGTTTGCCAAGAG  | TCCGTGGGTGTTCCACATTG   | 115       |
| CRYAA   | ACAACGAGAGGCAGGATGAC | AGGGGACAACCAAGGTGAG    | 249       |
| β-actin | CTACAATGAGCTGCGTGTGG | ACCAGAGGCATACAGGGACA   | 169       |

doi:10.1371/journal.pone.0044855.t001

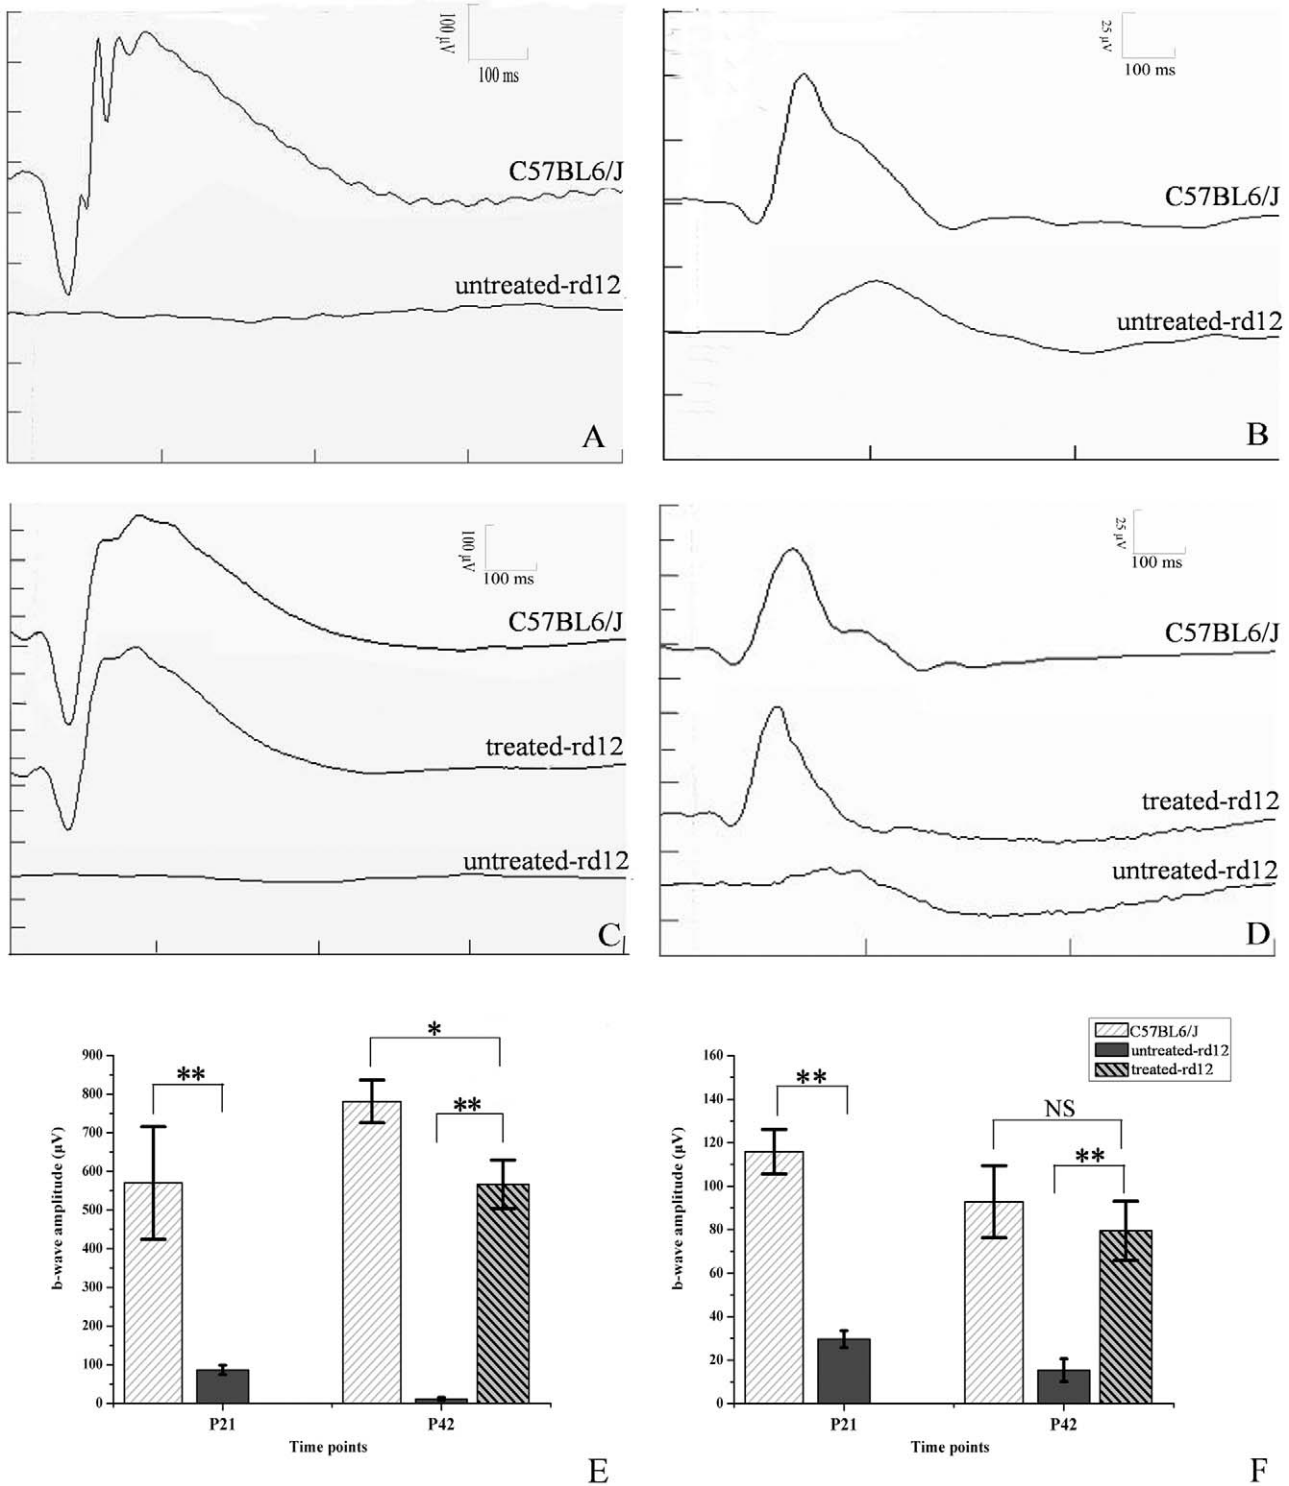

**Figure 1. Scotopic and photopic ERG testing of untreated, treated *rd12* and normal C57BL/6J eyes.** Panels A and B represent scotopic (panel A) and photopic (panel B) ERGs recorded on P21 from C57BL/6 (upper trace) or untreated *rd12* mice (lower trace). Panels C and D represent scotopic ERG (panel C) and photopic ERG (panel D) recorded on P42 from C57BL/6 (upper trace), treated *rd12* mice (middle trace) or untreated *rd12* mice (lower trace). Panels E and F indicate statistical comparison between b-wave amplitudes of different groups at both time points under scotopic and photopic conditions, respectively. N = 6/group, and error bars depict the standard error of the mean. Scotopic ERGs (A and C) were obtained using white stimulus of  $-5 \text{ cd}\cdot\text{s}/\text{m}^2$ , while photopic ERGs (B and D) were recorded using white stimulus of  $1.96 \text{ cd}\cdot\text{s}/\text{m}^2$  of *rd12* and C57BL/6J eyes. Scotopic ERG, b-wave amplitude of the untreated *rd12* eye was  $483.7 \pm 59.9 \mu\text{V}$  ( $p < 0.001$ ), lower than that of the normal control C57BL/6J eyes at P21, b-wave amplitude of the treated *rd12* eye became  $555.1 \pm 28.4 \mu\text{V}$  ( $p < 0.001$ ) on P42, higher than that of the untreated *rd12* eye. In photopic ERG, b-wave amplitude gap was  $86.2 \pm 4.54 \mu\text{V}$  ( $p < 0.001$ ) between the untreated *rd12* and B6 eyes on P21, and was  $64.2 \pm 6.5 \mu\text{V}$  ( $p < 0.001$ ) between the treated and untreated *rd12* eyes on P42. NS: no significance. \*:  $p < 0.05$ ; \*\*:  $p < 0.001$ . doi:10.1371/journal.pone.0044855.g001

analysis. Empty vector or vector containing PRDX6, which could show green fluorescence were transfected into MIO-M1 cells. Western blot and real time PCR proved PRDX6 overexpression at protein and mRNA level.

### Treatment of H<sub>2</sub>O<sub>2</sub>/Glucose Oxidase and the Survival Ratio Evaluation

Three MIO-M1 cell groups (including Lenti-PRDX6-GFP cells, Lenti-GFP cells and blank cells) were treated with H<sub>2</sub>O<sub>2</sub>/glucose oxidase (GO) at varied concentrations and exposure times. Survival ratio of each group at each condition was tested by MTS (3-(4,5-dimethylthiazol-2-yl)-5-(3-carboxymethoxyphenyl)-2-(4-sulfophenyl)-2H-tetrazolium) kit (Promega, USA). MTS (2 mg/mL; pH 6.5) was dissolved in PBS and filter sterilized. A 3 mM PMS (phenazine methosulfate) solution was also prepared (in PBS) and filter sterilized. These solutions were stored at -20°C in light-protected containers. To enhance the cellular reduction of MTS, PMS was added to MTS immediately before use (MTS-PMS ratio: 1:20). A portion of the mixture (150 µL) was added to each well. After incubation at 37°C in a humidified atmosphere with 5% CO<sub>2</sub> for 2 hours, 100 µL of the supernatant was diluted in 1 mL deionized water. The optical density was measured at 490 nm by means of spectrophotometry. Survival ratio of MIO-M1 was analyzed by means of MTS assay.

### Statistical Analysis

SPSS 18.0 (IBM Corporation, Armonk, NY) was used for statistical analysis and Origin 8.0 (OriginLab Corporation, Northampton, MA) for drawing figures and tables. Paired sample t-test and one-way ANOVA with Bonferroni correction was used for comparison between two groups and among three groups for measurement data. Differences were defined as significant at  $p < 0.05$ .

## Results

### Electroretinography

In both scotopic and photopic ERGs, b-wave amplitudes of the untreated *rd12* eyes were lower than those recorded from the eyes of normal control C57BL/6J mice, with delayed b-wave peak times (Fig. 1A, 1B). ERG b-wave amplitude and peak times improved significantly in *rd12* eyes 4 weeks after P14 treatment, approaching values recorded from normal, age-matched C57BL/6J eyes (Fig. 1C, 1D). Scotopic ERG showed that a-wave amplitudes of the untreated *rd12* eyes were  $9.13 \pm 3.94$  µV (4.3% of normal) and  $5.51 \pm 4.23$  µV (1.9% of normal) on P21 and P42, respectively, whereas the treated eyes demonstrated amplitudes of  $197.52 \pm 45.65$  µV on P42 (68% of normal), closer to the amplitudes recorded from C57BL/6J eyes at the same age ( $289.50 \pm 25.15$  µV). Similarly, b-wave amplitudes recorded from the untreated *rd12* eyes were  $86.52 \pm 11.95$  µV (15.2% of normal) and  $11.60 \pm 3.38$  µV (1.5% of normal) on P21 and P42, respectively, much lower than values of  $570.17 \pm 146.06$  µV and  $781.00 \pm 55.41$  µV recorded from the C57BL/6J eyes; meanwhile b-wave amplitudes recorded from the treated *rd12* eyes were  $566.67 \pm 63.08$  µV on P42 (72.5% of normal) (Fig. 1E). Photopic ERG signals showed similar trend (Fig. 1F). Photopic b-wave amplitude recorded from eyes of C57BL/6J mice was  $86.2 \pm 4.54$  µV ( $p < 0.001$ , on P21) and  $77.5 \pm 6.7$  µV ( $p < 0.001$  on P42) greater than that recorded from untreated *rd12* eyes, while photopic b-wave amplitude recorded from treated *rd12* eyes recovered and was not significantly different from the amplitude recorded from C57BL/6J eyes on P42 (difference of  $13.3 \pm 9.58$  µV,  $p = 0.196$ ). Thus, eyes from treated *rd12* mice

displayed dramatic improvement in both scotopic a- and b-wave amplitudes and photopic b-wave amplitudes after treatment, proving that gene therapy restored retinal function.

### Retinal protein profiling by two-dimensional gel electrophoresis

Two-dimensional gel electrophoresis proteomic maps of retinal protein samples of the 3 groups were generated using 17 cm gels over a pH range of 3.0–10.0. Image analysis by Image Master 2D determined the presence of ~1600 protein spots on every gel, most of which were distributed in a pH range of 4.0–8.0. Three repeats were performed on every sample and the analysis of the repeats demonstrated high repeatability. Comparisons on P14, P21 were made between untreated *rd12* and normal control retinas, and those on P42 were among treated and untreated *rd12* retinas and control retinas. On P14, 13 differential spots were identified including 8 up-regulated and 5 down-regulated proteins; on P21, 7 spots were considered differential, with 5 up-regulated and 2 down-regulated (Fig. 2). On P42, apparent difference in protein expression displayed between the untreated and the treated *rd12* eyes; 22 differentially expressed protein spots were identified and further investigated by the mass-spectrometry (MALDI-TOF-MS/MS) analysis searching against NCBI database (Fig. 3C). Among these, 13 proteins had over expression in the untreated *rd12* group versus the treated *rd12* and C57BL/6J groups; meanwhile, the treated *rd12* group had 6 up-regulated and 3 down-regulated proteins versus the C57BL/6J group. In summary, a total of 42 differential proteins with high repeatability were selected for MALDI-TOF-MS/MS analysis.

### Mass spectrometry analysis

Of the 42 proteins tested, 41 demonstrated mass spectrum peaks (except protein 12). Successful matches were achieved in 39 cases by mascot software with a matching ratio of 99%–100%. The information from MALDI-TOF-MS/MS analysis, including the name, NCBI number, theoretical isoelectric point and molecular weight, number of matched peptide and coverage, is listed in Table 2 and Table 3. Table 2 lists the 19 identified differential proteins between *rd12* mice and C57BL/6J mice retinas at age P14 and P21 (protein 12 was not identified), while Table 3 shows the other 22 differential proteins at age P42.

### Verification of differential proteins

Of the 39 successfully matched differential proteins, alpha A crystallin (CRYAA, a molecular chaperone), heat shock protein 70 (HSP70) and peroxiredoxin 6 (PRDX6), were considered as possible candidates implicated in the degenerative process of LCA. To clarify this hypothesis, additional tests related to these 3 proteins were performed.

### Immunofluorescence

Immunofluorescence showed that CRYAA was expressed in mouse retina from all 3 groups on P42, and it was mainly distributed in the ganglion cell layer and the outer nuclear layer, with a weak expression in both inner and outer plexiform layers. Compared to the treated *rd12* and C57BL/6J groups, CRYAA of the untreated *rd12* group displayed stronger expression in ganglion and photoreceptor cells (Figure 4A, upper panels).

HSP70, which was localized predominantly in the ganglion cell layer (but also in the RPE layer), also showed much stronger expression in the untreated *rd12* group than that in C57BL/6J and treated *rd12* groups on P42 (Figure 4A, middle panels).

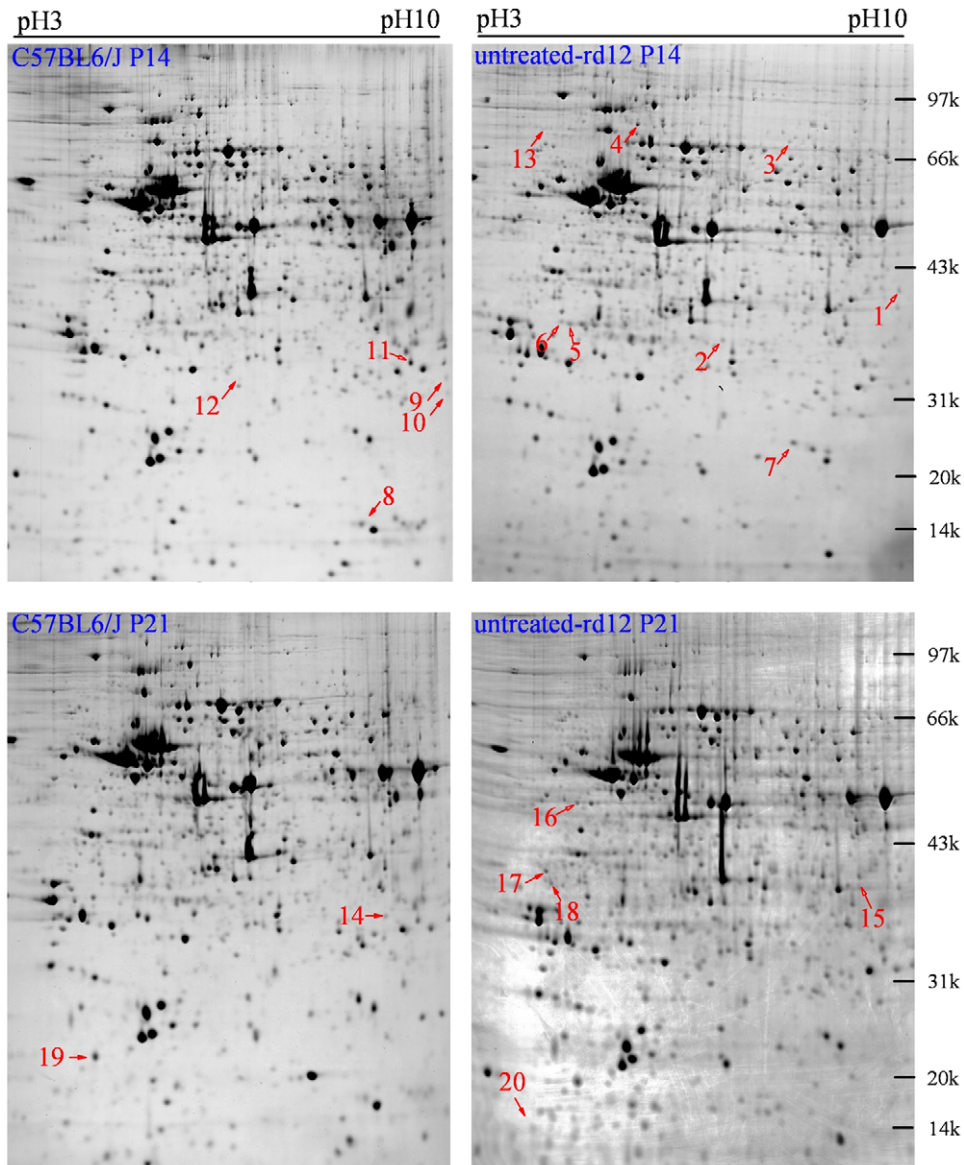

**Figure 2. Differential retinal protein markings at age P14 and P21.** Upper panels represent 2-DE gels from age P14 for C57BL/6J and untreated *rd12* mice. Lower panels represent 2-DE gels from age P21 for C57BL/6J and untreated *rd12* mice. Data are a composite of 3 independent experiments, and  $n=6$ /group. Red numbers indicate differential proteins. At age P14, 13 differential proteins (numbered from 1 to 13) were identified, including 8 up-regulated and 5 down-regulated proteins; at age P21, 7 differential proteins (numbered from 14 to 20) were identified, including 5 up-regulated and 2 down-regulated proteins. doi:10.1371/journal.pone.0044855.g002

PRDX6 had an extensive expression in every retinal layer and was also over expressed in the untreated *rd12* mice group compared to the other two groups on P42 (Figure 4A, lower panels).

In summary, the immunofluorescence results confirmed and expanded the information about those 3 retinal proteins obtained from the 2-DE analysis.

#### Western blot

Western blot was used to analyze the differences in the 3 selected proteins semi-quantitatively, and confirmed that the expression of all 3 proteins (CRYAA, HSP70 and PRDX6) in the untreated *rd12* group was much stronger than that in the treated

*rd12* and C57BL/6J groups, while their expressive intensity in the latter 2 groups was quite similar (Fig. 4B).

#### RT-PCR

Real-time PCR was conducted to obtain information at mRNA level, which showed that CRYAA mRNA was down-regulated in all 3 groups, the untreated *rd12* group demonstrating the lowest production (Fig. 4C). HSP70 mRNA level in the untreated *rd12* eyes was up-regulated and 2 times higher than that of the treated *rd12* group ( $p<0.05$ ), and 1.6 times higher than that of the C57BL/6J group ( $p>0.05$ ). PRDX6 mRNA expression in the untreated *rd12* group was 2.4 times higher than that in the other 2 groups ( $p<0.05$ ), while the level in the treated *rd12* group was not different from that in the C57BL/6J group ( $p>0.05$ ).

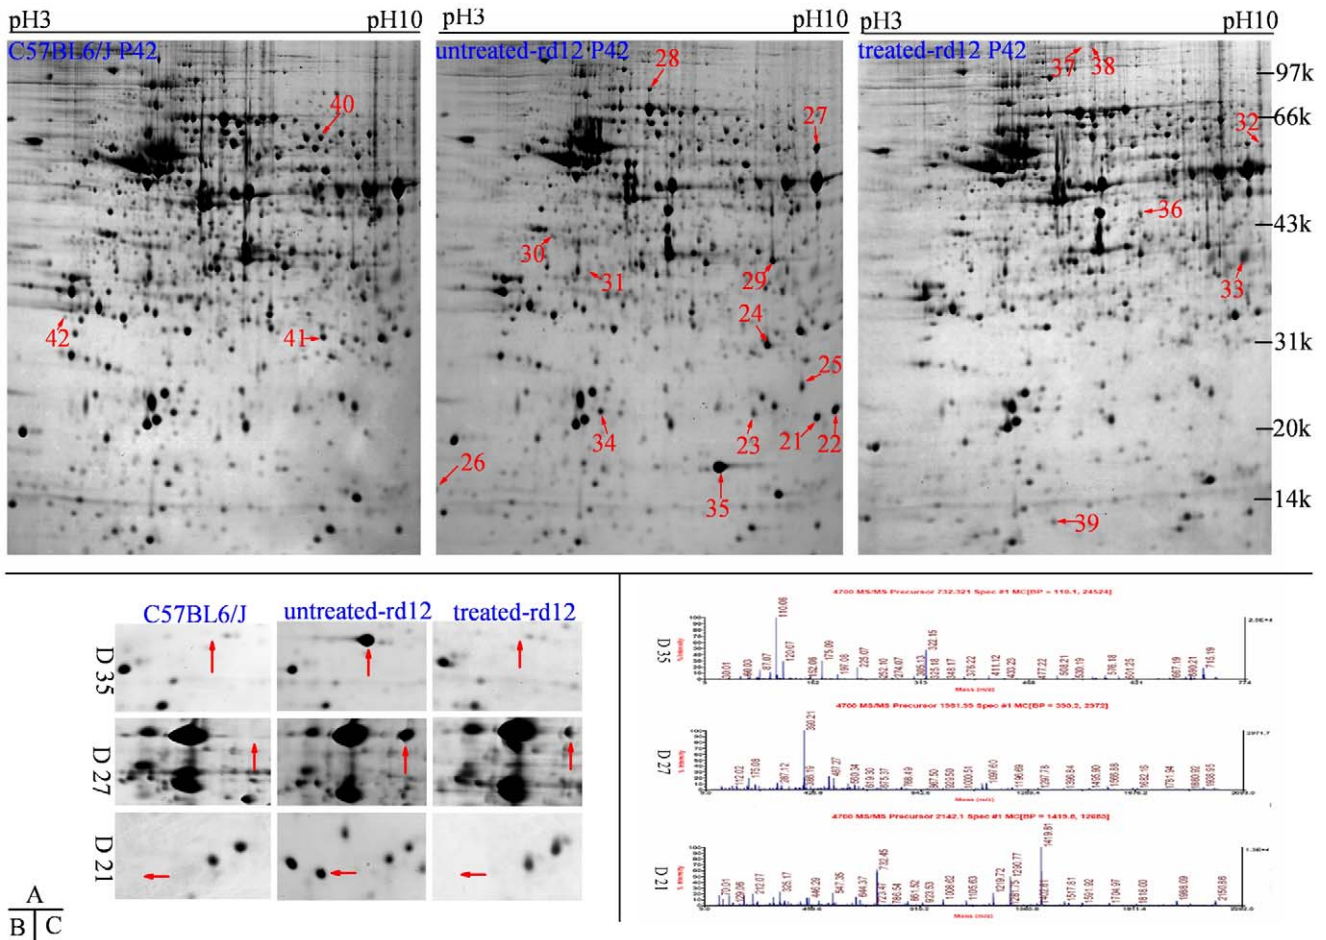

**Figure 3. Differential retinal proteins at age P42.** Upper panels (A) represent 2-DE gels of wide-type C57BL/6J (left panel), untreated *rd12* (middle panel) and treated *rd12* eyes (right panel) at age P42. Data are a composite of 3 independent experiments, and n=6/group. Differential proteins are marked with red numbers (from 21 to 42). Magnified details of differential proteins No. 21, 27 and 35 among the 3 eye groups at age P42 are presented in B. Graphical representation of mass spectrometry peaks from differential proteins No. 21, 27 and 35 are shown in C (the x- and y-axis represent mass-to-charge ratio (m/z) and relative intensity, respectively; the mass numbers of monoisotopic peaks [M+H]<sup>+</sup> for peptides are marked above individual peaks).  
doi:10.1371/journal.pone.0044855.g003

### Reactive Oxygen Species and apoptosis

The distribution and expression pattern of retinal ROS was detected by ROS fluorescein kit and confocal microscopy. ROS expression was stronger in untreated *rd12* eyes compared with C57BL/6J eyes, while the expression of ROS in treated *rd12* eyes decreased dramatically, approaching normal levels (Fig. 5, upper panels). A TUNEL test was used to evaluate retinal cell apoptosis. No signs of apoptosis were detected in C57BL/6J and treated *rd12* groups on P42, while in the untreated *rd12* group, several apoptotic cells could be localized at higher magnification. (Fig. 5, lower panels).

### Cell Culture and Lenti-PRDX6-GFP Transfection

Recombinant lentiviral vector with PRDX6 was constructed to infect Müller cells in culture in order to investigate the effect of PRDX6 overexpression, and its role in the process of oxidative damage. By transfecting Lenti-GFP into MIO-M1 cells, the best transfective condition was tested to be MOI = 5 with polybrene addition. After transfection of Lenti-PRDX6-GFP, PCR confirmed that PRDX6 gene was recombinant to the host gene, and

gene sequencing verified that it was 100% identical to the human PRDX6.

Seventy-two hours after transfection of Lenti-GFP and Lenti-PRDX6-GFP, MIO-M1 cells demonstrated intensive green fluorescence inside the cell bodies, which indicated successful transfection (Fig. 6A, central and right panel). Western blot confirmed that Lenti-PRDX6-GFP group expressed much more PRDX6 than the Lenti-GFP or blank (control) group at a protein level (Fig. 6B); RT-PCR demonstrated that the mRNA levels in the PRDX6 group were 6.3 times higher than that in GFP group or the blank (control) group (p<0.01; Fig. 6C). There was no statistically significant difference on mRNA levels between the GFP and the blank (control) group, confirming that vector transfection did not affect PRDX6 expression in normal cells.

### Survival Ratio Evaluation after Treatment with H<sub>2</sub>O<sub>2</sub> or Glucose Oxidase

Survival of MIO-M1 cell decreased in a concentration-dependent way after treatment with H<sub>2</sub>O<sub>2</sub>. However, cells transfected with Lenti-PRDX6-GFP consistently demonstrated higher survival rate compared to either the Lenti-GFP group or

**Table 2.** Mass spectrometry results of retinal differential proteins between rd12 and C57BL/6J mice at age P14 and P21.

| Group ID | Protein                                              | Acc.no.      | Theoretical |       | No. of matched peptides | Coverage (%) | Protein Score |
|----------|------------------------------------------------------|--------------|-------------|-------|-------------------------|--------------|---------------|
|          |                                                      |              | MW (kDa)    | PI    |                         |              |               |
| 1        | adipo Q ↑                                            | gi 1399498   | 26.83       | 5.3   | 5                       | 24.41        | 37            |
| 2        | UNC-119 homolog ↑                                    | gi 6755939   | 26.99       | 5.81  | 24                      | 81.24        | 767           |
| 3        | dihydropyrimidinase-like 3 isoform 2 ↑               | gi 6681219   | 61.9        | 6.04  | 22                      | 50.96        | 395           |
| 4        | dynein cytoplasmic 1 intermediate chain 2 ↑          | gi 6753658   | 68.35       | 5.16  | 13                      | 58.81        | 242           |
| 5        | PR264/SC35 ↑                                         | gi 1405747   | 13.97       | 10.24 | 12                      | 66.38        | 275           |
| 6        | unnamed protein product ↑                            | gi 26327249  | 29.7        | 5.15  | 14                      | 27.88        | 218           |
| 7        | similar to splicing factor, arginine/serine-rich 3 ↑ | gi 224084730 | 14.2        | 10.12 | 13                      | 64.24        | 292           |
| 8        | unnamed protein product ↓                            | gi 12846244  | 17.97       | 8.44  | 7                       | 72.52        | 422           |
| 9        | voltage-dependent anion channel 1 ↓                  | gi 6755963   | 30.74       | 8.62  | 9                       | 7.09         | 97            |
| 10       | platelet-activating factor acetylhydrolase ↓         | gi 6679201   | 25.84       | 6.42  | 13                      | 89.24        | 338           |
| 11       | Wbscr1 alternative spliced product ↓                 | gi 4972951   | 25.17       | 7.79  | 7                       | 70.63        | 228           |
| 13       | unnamed protein product ↑                            | gi 26329075  | 47.02       | 4.68  | 11                      | 72.02        | 430           |
| 14       | endoplasmic reticulum protein ERp29 precursor ↓      | gi 19526463  | 28.81       | 5.9   | 8                       | 22.37        | 197           |
| 15       | cytosolic malate dehydrogenase ↑                     | gi 387129    | 36.45       | 6.16  | 14                      | 73.3         | 608           |
| 16       | keratin 15 ↑                                         | gi 226823220 | 49.46       | 4.79  | 28                      | 80.67        | 669           |
| 17       | unnamed protein product ↑                            | gi 12833697  | 32.8        | 4.64  | 21                      | 47.21        | 355           |
| 18       | alpha-tropomyosin ↑                                  | gi 157787199 | 32.66       | 4.69  | 29                      | 42.98        | 425           |
| 19       | ribosomal protein, large P2 ↓                        | gi 83745120  | 11.64       | 4.42  | 8                       | 59.48        | 540           |
| 20       | phosphoprotein enriched in astrocytes 15 isoform 2 ↑ | gi 21426847  | 15.04       | 4.94  | 7                       | 51.22        | 315           |

Note: ↑ : the protein level is up-regulated in the untreated *rd12* retinas; ↓ : the protein level is down-regulated in the untreated *rd12* retinas.  
doi:10.1371/journal.pone.0044855.t002

the blank (control) group (Fig. 7A, 7B). For example, 8 hours after 0.225 mM H<sub>2</sub>O<sub>2</sub> treatment, the survival ratio of MIO-M1 cells decreased to 50% in Lenti-GFP and blank (control) groups, compared to 80% in the Lenti-PRDX6-GFP group. For all groups, the survival rate continued to decrease with prolonged exposure and increased concentration of H<sub>2</sub>O<sub>2</sub>. Of note, the survival ratio of the Lenti-PRDX6-GFP group was always higher than that of the other two groups, and the difference was statistically significant in the range from 0.150 to 0.225 mM at 8 hours, and from 0.200 to 1 mM at 24 hours ( $p < 0.05$ ) (Fig. 7A, 7B).

The effect of GO application on MIO-MI cell survival was similar to that of H<sub>2</sub>O<sub>2</sub> in the three groups. The survival rate of the Lenti-PRDX6-GFP group treated with GO was always higher than that in the other two groups (Fig. 7C, 7D); however, statistically significant difference was observed only in the range

from 2.5 to 5.0 μg/L at 8 hours, and from 3.0 to 5.0 μg/L at 24 hours ( $p < 0.05$ ).

## Discussion

### Gene therapy in the *rd12* mouse

Our results demonstrated that scotopic ERG responses were abnormally low at age P21 and became undetectable at age P42 in the untreated *rd12* mice, similar to our previous reports [32]. After subretinal administration of scAAV5-smCBA-hRPE65 vector, ERG amplitudes recovered dramatically to a level close to that of age-matched wild-type mouse, indicating a positive effect of gene therapy on retinal function, consistent with our previous observation at a slightly older age [30]. Scotopic ERG or photopic ERG was recorded in our previous reports [30], [32], while in this present study both types of ERG on the same mice were recorded and dramatic recovery was found for both rods and cones. The observation that gene therapy is protective to the cone function is



**Table 3.** Mass spectrometry results of retinal differential proteins between wide-type C57BL/6J, untreated rd12 and treated rd12 eyes at age P42.

| Group ID | Protein                                                                                                     | Acc.no.      | Theoretical |      | No.of matched peptides | Coverage (%) | Protein Score |
|----------|-------------------------------------------------------------------------------------------------------------|--------------|-------------|------|------------------------|--------------|---------------|
|          |                                                                                                             |              | MW (kDa)    | PI   |                        |              |               |
| 21       | peroxiredoxin 6 ↑                                                                                           | gi 6671549   | 24.81       | 5.98 | 16                     | 89.78        | 777           |
| 22       | crystallin, alpha A ↑                                                                                       | gi 30794510  | 22.48       | 6.35 | 15                     | 72.68        | 395           |
| 23       | crystallin, beta A4 ↑                                                                                       | gi 10946672  | 22.45       | 5.9  | 13                     | 78.39        | 586           |
| 24       | crystallin, beta A1 ↑                                                                                       | gi 20304089  | 25.19       | 5.98 | 19                     | 86.31        | 593           |
| 25       | crystallin, beta A1 ↑                                                                                       | gi 20304089  | 25.19       | 5.98 | 15                     | 79.92        | 570           |
| 26       | ribosomal protein, large P2 ↑                                                                               | gi 83745120  | 11.64       | 4.42 | 9                      | 58.13        | 484           |
| 27       | Heat shock protein 70 ↑                                                                                     | gi 42542422  | 70.83       | 5.28 | 33                     | 79.74        | 674           |
| 28       | hypothetical protein LOC433182 ↑                                                                            | gi 70794816  | 47.11       | 6.37 | 29                     | 59.92        | 726           |
| 29       | crystallin, beta A1 ↑                                                                                       | gi 20304089  | 25.19       | 5.98 | 16                     | 85.66        | 475           |
| 30       | eukaryotic translation elongation factor 1 delta isoform b ↑                                                | gi 54287684  | 31.27       | 4.96 | 11                     | 30.94        | 212           |
| 31       | unnamed protein product ↑                                                                                   | gi 26328639  | 17.82       | 9.41 | 11                     | 61.51        | 409           |
| 32       | fascin homolog 1, actin bundling protein *                                                                  | gi 113680348 | 54.47       | 6.44 | 26                     | 35.72        | 321           |
| 33       | peroxiredoxin 6 *                                                                                           | gi 6671549   | 24.81       | 5.98 | 24                     | 89.54        | 837           |
| 34       | modifier 2 ↑                                                                                                | gi 53165     | 19.74       | 4.96 | 13                     | 72.23        | 571           |
| 35       | alpha-A-crystallin ↑                                                                                        | gi 387134    | 18.53       | 5.86 | 16                     | 75.91        | 499           |
| 36       | L-lactate dehydrogenase B *                                                                                 | gi 6678674   | 36.55       | 5.7  | 13                     | 52.44        | 311           |
| 37       | Spna2 protein *                                                                                             | gi 20380003  | 156.1       | 5.29 | 17                     | 17.88        | 52            |
| 38       | Spna2 protein *                                                                                             | gi 20380003  | 156.1       | 5.29 | 45                     | 43.65        | 259           |
| 39       | retinol binding protein 1, cellular *                                                                       | gi 6755300   | 15.84       | 5.1  | 14                     | 86.17        | 494           |
| 40       | RecName: Full = Inosine-5'-monophosphate dehydrogenase 1; Short = IMP dehydrogenase 1; AltName: Full = IM # | gi 1708472   | 55.26       | 6.29 | 23                     | 56.13        | 541           |
| 41       | crystallin, beta A2 #                                                                                       | gi 10946978  | 22.22       | 6.3  | 12                     | 73.53        | 617           |
| 42       | eukaryotic translation initiation factor 6 #                                                                | gi 27501448  | 26.49       | 4.63 | 5                      | 22.4         | 264           |

Note: ↑: the protein is up-regulated in the untreated *rd12* retinas; \*: the protein is up-regulated in the treated *rd12* retinas; #: the protein is up-regulated in the C57BL/6J retinas.

doi:10.1371/journal.pone.0044855.t003

an important extension of our previous findings, as it indicates the potential for restoration of photopic vision in LCA patients, which is much more related to their daily activities and quality of life.

Previous study by our group demonstrated that RPE65 protein expression was positively correlated with improved ERG activity after the administration of the same vector scAAV5-smCBA-hRPE65 in *rd12* mice [30]. Although rod outer segments degeneration goes on, outer nuclear layer appears normal at P42 in *rd12* eyes; meanwhile, cone degeneration starts around P14 and only a small number of M-cones remain at the dorsal and temporal parts of the *rd12* retina at age P42 [32], [33]. These findings focused on investigation of morphological changes in the retinal structure before and at age P42, however much more vital information might be explored by proteomic changes in this

period, when the retinal function had already significantly deteriorated while the morphology still preserved relatively. The present study complemented this deficiency by conducting a retinal proteomic analysis in *rd12* mice at ages P14, P21 and P42, after a subretinal injection of the scAAV5-smCBA-hRPE65 vector at P14.

### Proteomic differences

Currently, very little is known about the proteomic makeup in animal models of inherited retinal degenerative disorders (RDD). Cavusoglu et al. (2003) found loss of proteins involved in the rod-specific phototransduction cascade and induction of proteins from the crystallin family in rd1 mice, with a recessive mutation in the *PDE6B* gene [34]. Finnegan et al. (2010) observed several proteins

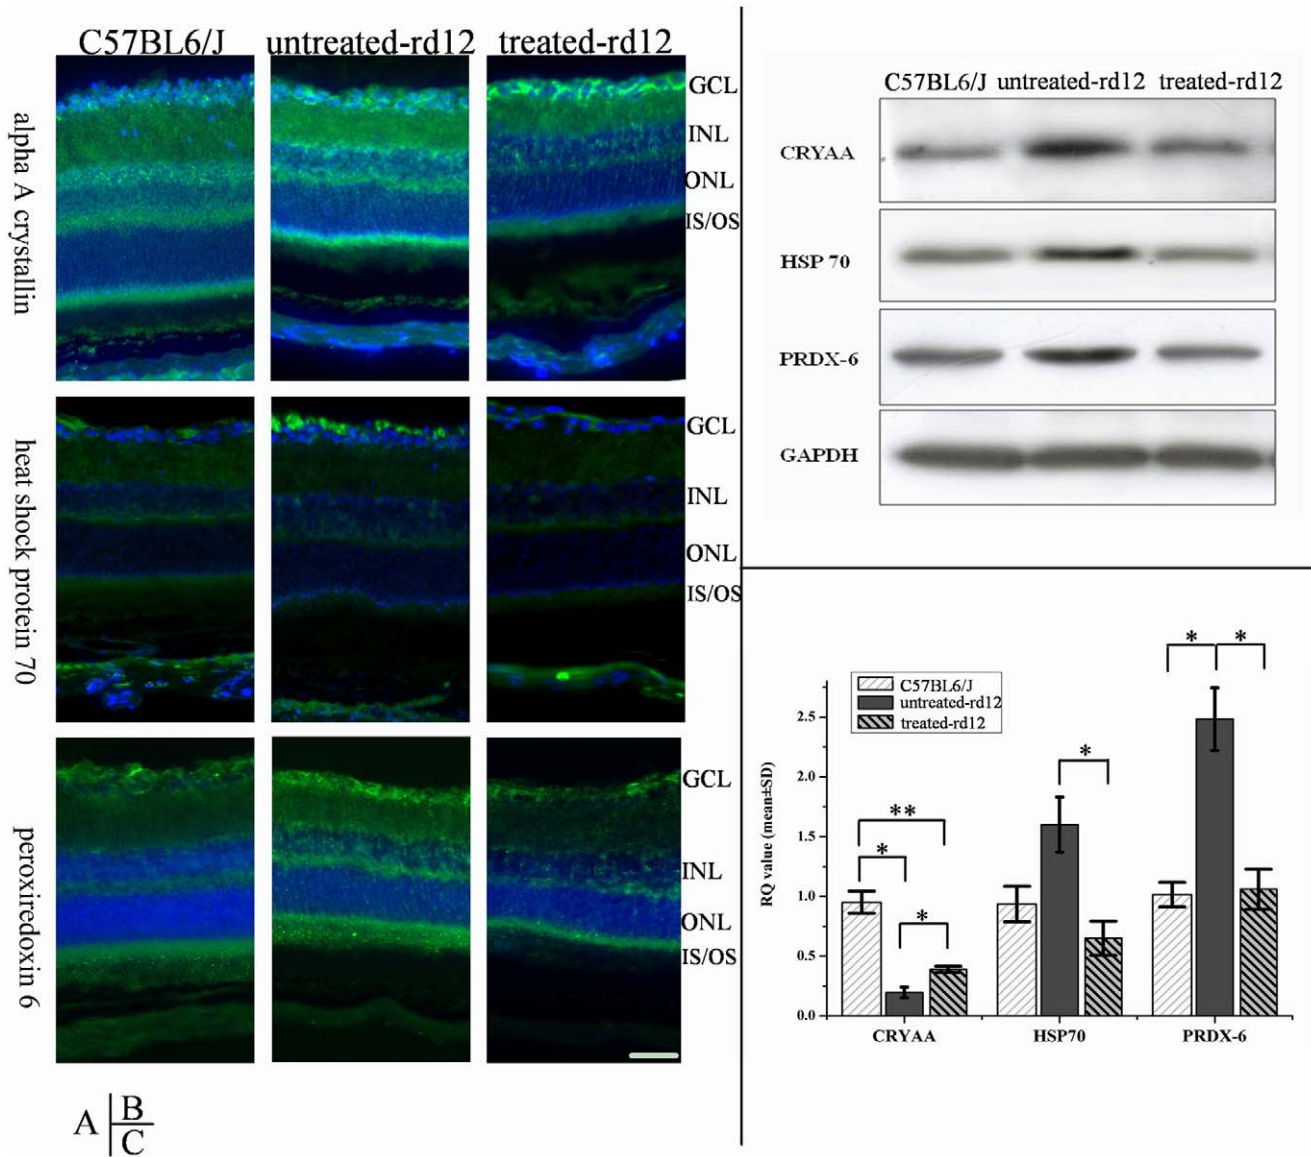

**Figure 4. Immunofluorescence, Western blot and RT-PCR of CRYAA, HSP70 and PRDX6.** Immunofluorescence (A), western blot (B) and RT-PCR (C) results of CRYAA, HSP70 and PRDX6 in retinas of wide-type, untreated *rd12* and treated *rd12* eyes at P42. Data are a composite of 3 independent experiments (for A, B and C), and n=6/group (B) and 4/group (C). The green staining in A represents the targeted proteins (FITC) while the blue color indicates nucleus staining with DAPI. Western blot (B) confirmed that all 3 proteins had higher expressions in untreated *rd12* group, while the difference between the treated *rd12* and C57BL/6J group was not significant. RT-PCR results (C) showed that CRYAA mRNA level was down-regulated in all 3 groups, and the untreated *rd12* group demonstrated the lowest levels. HSP70 mRNA levels of the untreated *rd12* group were 2 times higher compared to the treated *rd12* group (p<0.05), and 1.6 times higher compared to the C57BL/6J group (p>0.05). PRDX6 mRNA of the untreated *rd12* group was 2.4 times higher compared to the other 2 groups (p<0.05), while the mRNA levels of the treated *rd12* group were not different compared to that of the C57BL/6J group. Error bars depict the standard error of the mean. Calibration bar = 50 μm. doi:10.1371/journal.pone.0044855.g004

differentially expressed during retinal degeneration in chicken model of retinal degeneration [35]. LCA is a multigenic retinal degenerative disorder which may involve various protein alterations during the disease progression and currently there is a lack of published data about retinal protein changes during the natural course of the disease or related to any treatment paradigms in either animal models or in the human condition.

Apart from three unsuccessfully identified proteins, our results identified a total of 39 differential proteins between the treated, untreated and C57BL/6J retinas at age P14, P21 and P42. Surprisingly, the proteins that were differential at age P14 or P21,

were not differential at P42. This result suggests a protein expression and regulation pattern that changes considerably during the age range investigated in this study.

Of note, the crystalline family was well represented among the differential proteins at age P42. Seven (32%) out of the 22 differential proteins identified at this time point were members of this family (Table 3). Although crystallins are usually considered structural proteins found in the lens and the cornea of the eye, recent researches showed that they were involved in RDD [36], [37]. The alpha crystallin forms are similar to the small heat shock proteins with chaperone-like properties, including the ability to

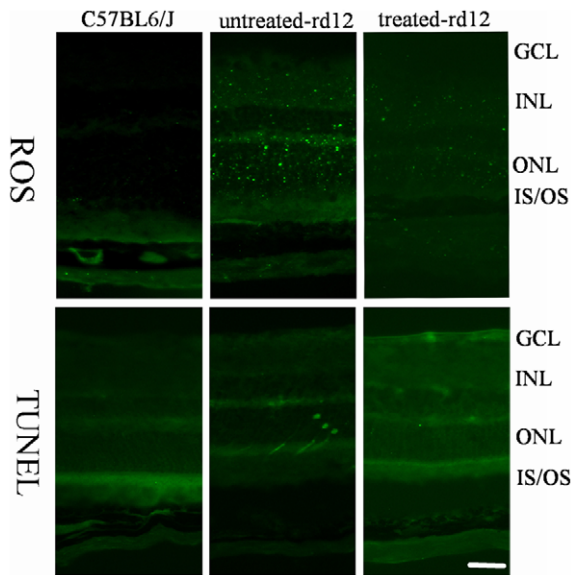

**Figure 5. Reactive oxygen species and apoptosis determination at age P42.** Green fluorescent staining indicates expression of ROS in the upper row panels, while it indicates apoptotic cell death by TUNEL in the lower row panels. Data are a composite of 3 independent experiments. Note the dramatic decrease in ROS presence in treated *rd12* eyes (right upper panel) compared to the abundant presence of ROS in the untreated *rd12* eyes (middle upper panel). Similarly, no signs of apoptosis are present in the treated *rd12* eyes (lower right panel), and several apoptotic cells could be identified in the untreated *rd12* eyes (middle lower panel). Calibration bar = 50  $\mu$ m. doi:10.1371/journal.pone.0044855.g005

increase cellular tolerance to stress. Therefore, we decided to further investigate the role of alpha A crystallin (CRYAA) in *rd12* mice. Similarly, heat shock protein 70 (HSP70) was of a particular interest in the set of identified differential proteins, as it has been demonstrated that its expression declines during normal aging of the retina [38] and is involved in retinal resistance to injury either in vitro [39] or in vivo, in a mouse model of LCA [40]. Finally, in this set of proteins, there is a lack of information about the role of peroxiredoxin-6 (PRDX6) in RDD. However, it has been demonstrated that PRDX6 is involved in glutamate-induced retinal toxicity [41], [42] and protects against hypoxia-induced retinal ganglion cell damage [43]. Thus, the detailed investigation of PRDX6 was considered important and this protein was also selected for additional tests.

### Alpha A crystallin

The alpha A crystalline protein, was originally found in lens tissue and its role was established as one of the main factors maintaining the transparency of the vertebrate lens [44]. Subsequently, its presence was identified in other cells types and ocular tissues. In 1994, Deretic et al. reported that alpha A- and alpha B-Crystallins bound specifically to the photoreceptor post-Golgi membranes that mediated transport of newly synthesized rhodopsin in frog retinal photoreceptors [45]. This protein was also demonstrated to be a protective factor in retinal pathologic processes, as mRNA of CRYAA as well as other 9 crystallins displayed strong sustained up-regulation after retinal [46] and light injury [47]. In the present study, we found that CRYAA levels were significantly higher in the untreated *rd12* group compared to the treated *rd12* and control (C57BL/6J) groups. The precise mechanism of CRYAA involvement in the process of retinal

degeneration is currently unknown. Our previous findings showed that rod outer segments in *rd12* mice are degenerated and many cones are dead at P42 [32]. One possibility is that the elevated CRYAA in untreated *rd12* retinas was a response to photoreceptor cell death, helping the RPE cells to phagocyte the degenerating photoreceptor outer segments.

There was a discordance in CRYAA expression between the mRNA and protein level in untreated *rd12* at age P42 (compare CRYAA levels in Fig. 4B and 4C). This might be caused by a negative feedback between protein levels and mRNA expression, as the elevated levels of retinal CRYAA protein might inhibit mRNA transcription to maintain level of the protein in the tissue within certain range.

### Heat shock protein 70

Heat shock protein 70 is a member of the heat shock protein family, which is an important part of the process of proper protein folding, and helps protect cells from stress [48]. It also functions as an intracellular chaperone for other proteins, assisting in the establishment of proper protein shape, disposal of damaged or defective proteins and facilitating the transmembrane transport of proteins [49]. By influencing multiple steps in apoptotic signaling cascades, HSP70 is a powerful anti-apoptotic protein [50], and was also found to be neuroprotective in the context of retinal ganglion cell injury by an interaction with HSP27 [51].

In our experiments, HSP70 was localized mainly in the ganglion cell layer and less in the RPE layer. The protein mRNA level in untreated *rd12* eyes was much higher than that in either treated *rd12* eyes or normal eyes. The normalization of HSP70 level in treated *rd12* eyes (both at a protein and mRNA levels) correlates well with our observation that retinal apoptosis is not present in those eyes in contrast to the untreated *rd12* eyes. This finding indirectly supports previous studies demonstrating that HSP70 could play an inhibitory role in retinal degeneration by protecting the neuronal cells from stress-induced apoptosis [51].

### Peroxiredoxin, reactive oxygen species and apoptosis

Peroxiredoxins are a ubiquitous family of antioxidant enzymes that also control cytokine-induced peroxide levels and thereby mediate signal transduction in mammalian cells [52]. Peroxiredoxins share the same basic catalytic mechanism, in which a redox-active cysteine (the peroxidatic cysteine) in the active site is oxidized to a sulfenic acid by the peroxide substrate [53], and they have recently been of elevated scientific interest due to their distinctive role in the disposal of ROS and peroxide. Peroxiredoxin-6 (PRDX6), one particular member, has been found to provide a neuroprotective effect from glutamate, TNF-alpha and hypoxia induced cytotoxicity by reducing ROS level and NF- $\kappa$ B activation in rat retinal ganglion cells [42, 43]. Kubo et al. found abundant protein supply of PRDX6 and PRDX5 inhibited the oxidative stress-induced DNA damage after high-glucose exposure in retinal pericytes [54].

Similar to the results of HSP70, the expression of PRDX6 in untreated *rd12* retinas was also found to be much higher than that in normal age-matched or the treated retinas, which supported the previous findings of PRDX6 as a neuroprotector from retinal oxidative stress. PRDX6 level in treated *rd12* retinas was also close to that of normal C57BL/6J retinas, which was validated both at protein and mRNA levels. The normalization of PRDX6 level in treated *rd12* retinas is an additional demonstration of the effectiveness of gene therapy. In addition, tests of ROS expression confirmed their presence in retinal photoreceptors and elevated levels in untreated *rd12* eyes, indicating that over expression of PRDX6 protected retina from oxidative damage by removal of

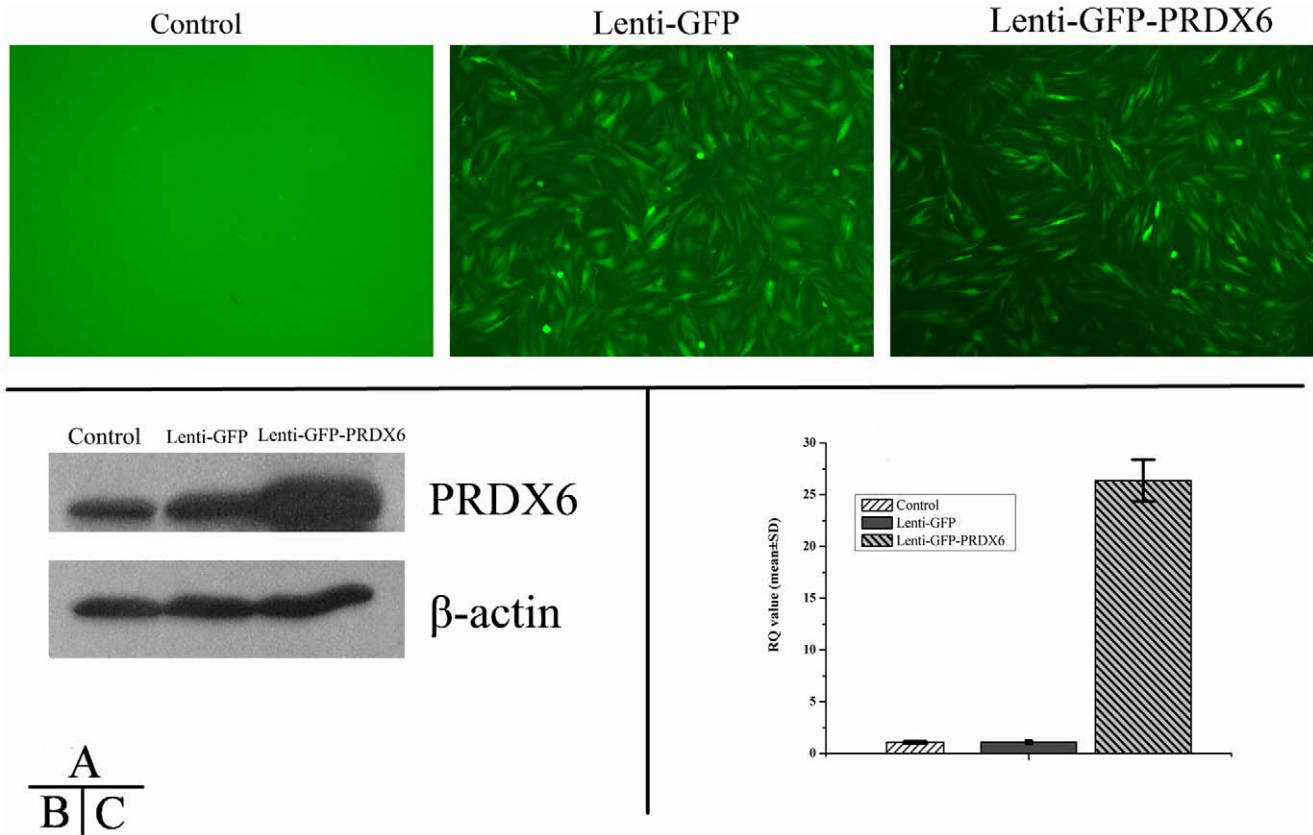

**Figure 6. Immunofluorescence and Western blot of Lenti-PRDX6-GFP vector in MIO-M1 cells.** Transfection of Lenti-PRDX6-GFP was evaluated by immunofluorescence (A), western blot (B) and RT-PCR (C). Data are a composite of 6 independent experiments for A, and 3 for B and C. Panels in A represent confocal micrographs and demonstrate GFP immunofluorescence in transfected groups indicating successful transfection; Western blot results in B indicate that PRDX6 group expressed much more PRDX6 than either the GFP or the blank group at protein level; Bar graphs in C indicate the results from the RT-PCR analysis, demonstrating an over expression of PRDX6 6.3 times compared to the other two groups at mRNA level ( $p < 0.01$ ). Error bars depict the standard error of the mean. Calibration bar = 50  $\mu$ m. doi:10.1371/journal.pone.0044855.g006

ROS. TUNEL tests confirmed no obvious signs of retinal cell apoptosis in treated *rd12* mice and in C57BL/6J mice. In contrast, a low level of apoptosis was observed in untreated *rd12* eyes at age P42.

Oxidative damage has been found to play an important role in vision-threatening retinal diseases such as age-related macular degeneration. There are multiple types of ROS scavengers in the retina, including PRDXs [55], to resist high level of ROS which induce neuronal dysfunction [56]. ROS accumulation was observed in models of retinal light damage, in which retinoid visual cycle was affected [57]. In *rd12* retina, the absence of *RPE65* suppresses the retinoid cycle and probably induces an increase in ROS. After application of *RPE65* gene therapy, the increased *RPE65* expression likely restored the retinoid visual cycle and enabled regenerated 11-*cis*-retinal to conjugate with its apoprotein, opsin, thus eliminating the main cause of photoreceptor cell death in *rd12* retinas. Most likely, this is the reason why ROS, as well as other protective factors (CRYAA, HSP70 and PRDX6), decreased to a normal level in treated *rd12* eyes.

With gene recombinant technique, the increase of PRDX6 expression resulted in a considerable reduction of  $H_2O_2$ -induced oxidative damage. When the  $H_2O_2$  concentration exceeded certain threshold, this resulted in very high levels of cell death, indicating that antioxidative effect of PRDX6 is limited to a range of concentration of peroxides. Our findings support the evidence for an antioxidative effect of PRDX6 in the retina and suggest that

normalization of PRDX6 level could be a good indicator for a decreased retinal injury due to ROS. They also support the possibility that PRDX6 could be used as an indicator of therapeutic effectiveness in models of RDD.

A weakness of the current study is the absence of data from sham injected eyes that would control for both potential growth factor release caused by wounding of the eye, as well as the effect of topical dexamethasone treatment after injection. However, the results on protein change studies revealed no identified growth factors in the injected eyes, and elevated levels of proteins which appeared to return to control levels at the end of the study period, indicating that both the wounding of the eye by the injection itself and the use of dexamethasone had minimal effect and are unlikely to be confounding factors in this case. Another limitation in the present study is that only three of the identified differential proteins have been tested and explored in more detail. The remaining proteins, especially the unnamed ones, deserve further exploration of their identities and functions. Also the mechanistic detail about the PRDX6 function in the retina and its role in the disease process is still unclear and needs more investigation.

## Conclusions

Our results support the effectiveness of gene therapy in LCA and reveal new details of disease related protein level changes. Three proteins involved in regulation of apoptosis and neuropto-

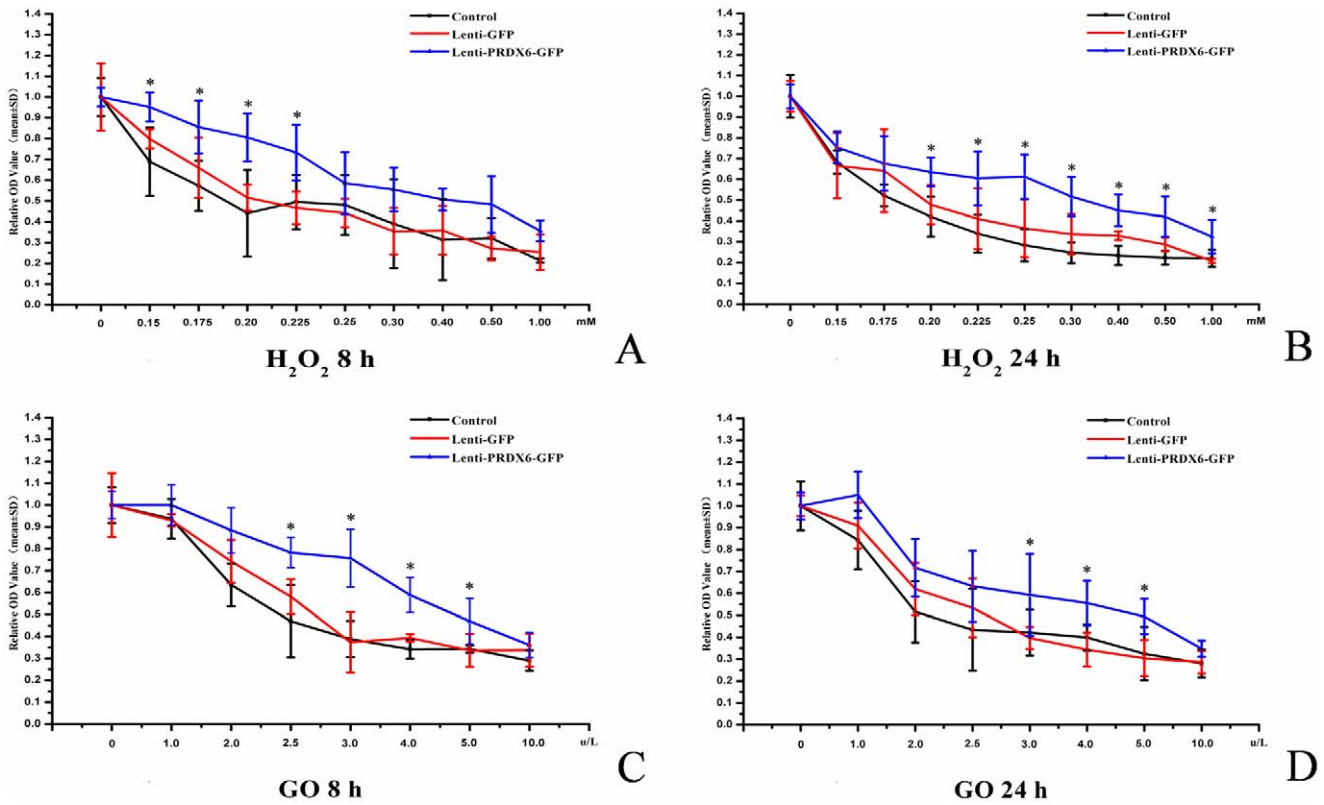

**Figure 7. Survival rate of MIO-M1 cells after administration of H<sub>2</sub>O<sub>2</sub> and GO and at varied concentrations and time points.** Panels A and B represent the relative optical density (OD) values (positively related to number of live cells) of surviving MIO-M1 cells at 8 hrs (A) and 24 hrs (B) at various concentrations of H<sub>2</sub>O<sub>2</sub> (in mM – horizontal axis). Panels C and D represent average values (±SEM) of surviving MIO-M1 cells at 8 hrs (C) and 24 hrs (D) at various concentrations of GO (in µg/L – horizontal axis). N = 6/group in every panel, error bars depict the standard error of the mean. Results showed that the survival ratio of the PRDX6 group was always higher than those in the GFP and control group after treatment of H<sub>2</sub>O<sub>2</sub> and GO at varied concentrations for 8 and 24 hours. The concentration range of H<sub>2</sub>O<sub>2</sub> treatment, where significant difference was observed between the PRDX6 group and the GFP or the blank group, was from 0.15 to 0.225 mM at 8 hours, and from 0.20 to 1.00 mM at 24 hours (p < 0.05). After GO treatment, the concentration range where significant difference was observed ranged from 2.5 to 5.0 µg/L at 8 hours, and from 3.0 to 5.0 µg/L at 24 hours (p < 0.05).

doi:10.1371/journal.pone.0044855.g007

tection were discovered, which pointed to specific potential mechanisms of restoring retinal homeostasis.

**Author Contributions**

Conceived and designed the experiments: QZ. Performed the experiments: QZ JH CZ JZ YZ XD. Analyzed the data: YZ BC SM JL. Contributed reagents/materials/analysis tools: JP JQ. Wrote the paper: YR RT WL.

**References**

- Koenekoop RK (2004) An overview of Leber congenital amaurosis: a model to understand human retinal development. *Surv Ophthalmol* 49: 379–398.
- Stone EM (2007) Leber congenital amaurosis – a model for efficient genetic testing of heterogeneous disorders: LXIV Edward Jackson Memorial Lecture. *Am J Ophthalmol* 144: 791–811.
- Wang P, Guo X, Zhang Q (2007) Further evidence of autosomal-dominant Leber congenital amaurosis caused by heterozygous CRX mutation. *Graefes Arch Clin Exp Ophthalmol* 245: 1401–1402.
- Tzekov RT, Liu Y, Sohocki MM, Zack DJ, Daiger SP, et al. (2001) Autosomal dominant retinal degeneration and bone loss in patients with a 12-bp deletion in the CRX gene. *Invest Ophthalmol Vis Sci* 42: 1319–1327.
- Pelletier V, Jambou M, Delphin N, Zinovieva E, Stum M, et al. (2007) Comprehensive survey of mutations in RP2 and RPGR in patients affected with distinct retinal dystrophies: genotype-phenotype correlations and impact on genetic counseling. *Hum Mutat* 28: 81–91.
- Morimura H, Fishman GA, Grover SA, Fulton AB, Berson EL, et al. (1998) Mutations in the RPE65 gene in patients with autosomal recessive retinitis pigmentosa or leber congenital amaurosis. *Proc Natl Acad Sci U S A* 95: 3088–3093.
- Hamel CP, Tsilou E, Pfeiffer BA, Hooks JJ, Detrick B, et al. (1993) Molecular cloning and expression of RPE65, a novel retinal pigment epithelium-specific microsomal protein that is post-transcriptionally regulated in vitro. *J Biol Chem* 268: 15751–15757.
- Moiseyev G, Chen Y, Takahashi Y, Wu BX, Ma JX (2005) RPE65 is the isomerohydrolase in the retinoid visual cycle. *Proc Natl Acad Sci U S A* 102: 12413–12418.
- Woodruff ML, Wang Z, Chung HY, Redmond TM, Fain GL, et al. (2003) Spontaneous activity of opsin apoprotein is a cause of Leber congenital amaurosis. *Nat Genet* 35: 158–164.
- Znoiko SL, Rohrer B, Lu K, Lohr HR, Crouch RK, et al. (2005) Downregulation of cone-specific gene expression and degeneration of cone photoreceptors in the Rpe65<sup>-/-</sup> mouse at early ages. *Invest Ophthalmol Vis Sci* 46: 1473–1479.
- den Hollander AI, Roepman R, Koenekoop RK, Cremers FP (2008) Leber congenital amaurosis: genes, proteins and disease mechanisms. *Prog Retin Eye Res* 27: 391–419.
- Pang JJ, Chang B, Kumar A, Nusinowitz S, Noorwez SM, et al. (2006) Gene therapy restores vision-dependent behavior as well as retinal structure and function in a mouse model of RPE65 Leber congenital amaurosis. *Mol Ther* 13: 565–572.
- Dejneka NS, Surace EM, Aleman TS, Cideciyan AV, Lyubarsky A, et al. (2004) In utero gene therapy rescues vision in a murine model of congenital blindness. *Mol Ther* 9: 182–188.
- Acland GM, Aguirre GD, Ray J, Zhang Q, Aleman TS, et al. (2001) Gene therapy restores vision in a canine model of childhood blindness. *Nat Genet* 28: 92–95.

15. Narfstrom K, Bragadottir R, Redmond TM, Rakoczy PE, van Veen T, et al. (2003) Functional and structural evaluation after AAV. RPE65 gene transfer in the canine model of Leber's congenital amaurosis. *Adv Exp Med Biol* 533: 423–430.
16. Bennicelli J, Wright JF, Komaromy A, Jacobs JB, Hauck B, et al. (2008) Reversal of blindness in animal models of leber congenital amaurosis using optimized AAV2-mediated gene transfer. *Mol Ther* 16: 458–465.
17. Le Meur G, Stieger K, Smith AJ, Weber M, Deschamps JY, et al. (2007) Restoration of vision in RPE65-deficient Briard dogs using an AAV serotype 4 vector that specifically targets the retinal pigmented epithelium. *Gene Ther* 14: 292–303.
18. Acland GM, Aguirre GD, Bennett J, Aleman TS, Cideciyan AV, et al. (2005) Long-term restoration of rod and cone vision by single dose rAAV-mediated gene transfer to the retina in a canine model of childhood blindness. *Mol Ther* 12: 1072–1082.
19. Narfstrom K, Katz ML, Ford M, Redmond TM, Rakoczy E, et al. (2003) In vivo gene therapy in young and adult RPE65<sup>-/-</sup> dogs produces long-term visual improvement. *J Hered* 94: 31–37.
20. Jacobson SG, Boye SL, Aleman TS, Conlon TJ, Zeiss CJ, et al. (2006) Safety in nonhuman primates of ocular AAV2-RPE65, a candidate treatment for blindness in Leber congenital amaurosis. *Hum Gene Ther* 17: 845–858.
21. Buch PK, Bainbridge JW, Ali RR (2008) AAV-mediated gene therapy for retinal disorders: from mouse to man. *Gene Ther* 15: 849–857.
22. Bainbridge JW, Smith AJ, Barker SS, Robbie S, Henderson R, et al. (2008) Effect of gene therapy on visual function in Leber's congenital amaurosis. *N Engl J Med* 358: 2231–2239.
23. Maguire AM, Simonelli F, Pierce EA, Pugh EN Jr., Mingozzi F, et al. (2008) Safety and efficacy of gene transfer for Leber's congenital amaurosis. *N Engl J Med* 358: 2240–2248.
24. Hauswirth WW, Aleman TS, Kaushal S, Cideciyan AV, Schwartz SB, et al. (2008) Treatment of leber congenital amaurosis due to RPE65 mutations by ocular subretinal injection of adeno-associated virus gene vector: short-term results of a phase I trial. *Hum Gene Ther* 19: 979–990.
25. Simonelli F, Ziviello C, Testa F, Rossi S, Fazzi E, et al. (2007) Clinical and molecular genetics of Leber's congenital amaurosis: a multicenter study of Italian patients. *Invest Ophthalmol Vis Sci* 48: 4284–4290.
26. Jacobson SG, Cideciyan AV, Ratnakaram R, Heon E, Schwartz SB, et al. (2012) Gene therapy for leber congenital amaurosis caused by RPE65 mutations: safety and efficacy in 15 children and adults followed up to 3 years. *Arch Ophthalmol* 130: 9–24.
27. Lai CM, Yu MJ, Brankov M, Barnett NL, Zhou X, et al. (2004) Recombinant adeno-associated virus type 2-mediated gene delivery into the Rpe65<sup>-/-</sup> knockout mouse eye results in limited rescue. *Genet Vaccines Ther* 2: 3.
28. Pawlyk BS, Smith AJ, Buch PK, Adamian M, Hong DH, et al. (2005) Gene replacement therapy rescues photoreceptor degeneration in a murine model of Leber congenital amaurosis lacking RPGRIP. *Invest Ophthalmol Vis Sci* 46: 3039–3045.
29. Kostic C, Crippa SV, Pignat V, Bemelmans AP, Samardzija M, et al. (2011) Gene therapy regenerates protein expression in cone photoreceptors in Rpe65(R91W/R91W) mice. *PLoS One* 6: e16588.
30. Li W, Kong F, Li X, Dai X, Liu X, et al. (2009) Gene therapy following subretinal AAV5 vector delivery is not affected by a previous intravitreal AAV5 vector administration in the partner eye. *Mol Vis* 15: 267–275.
31. Tezel G, Yang X, Cai J (2005) Proteomic identification of oxidatively modified retinal proteins in a chronic pressure-induced rat model of glaucoma. *Invest Ophthalmol Vis Sci* 46: 3177–3187.
32. Li X, Li W, Dai X, Kong F, Zheng Q, et al. (2011) Gene therapy rescues cone structure and function in the 3-month-old rd12 mouse: a model for midcourse RPE65 leber congenital amaurosis. *Invest Ophthalmol Vis Sci* 52: 7–15.
33. Pang J, Boye SE, Lei B, Boye SL, Everhart D, et al. (2010) Self-complementary AAV-mediated gene therapy restores cone function and prevents cone degeneration in two models of Rpe65 deficiency. *Gene Ther* 17: 815–826.
34. Cavusoglu N, Thierse D, Mohand-Said S, Chalmel F, Poch O, et al. (2003) Differential proteomic analysis of the mouse retina: the induction of crystallin proteins by retinal degeneration in the rd1 mouse. *Mol Cell Proteomics* 2: 494–505.
35. Finnegan S, Robson J, Hocking PM, Ali M, Inglehearn CF, et al. (2010) Proteomic profiling of the retinal dysplasia and degeneration chick retina. *Mol Vis* 16: 7–17.
36. Augusteyn RC (2004) alpha-crystallin: a review of its structure and function. *Clin Exp Optom* 87: 356–366.
37. Fort PE, Lampi KJ (2011) New focus on alpha-crystallins in retinal neurodegenerative diseases. *Exp Eye Res* 92: 98–103.
38. Bernstein SL, Liu AM, Hansen BC, Somiari RI (2000) Heat shock cognate-70 gene expression declines during normal aging of the primate retina. *Invest Ophthalmol Vis Sci* 41: 2857–2862.
39. Bailey TA, Kanuga N, Romero IA, Greenwood J, Luthert PJ, et al. (2004) Oxidative stress affects the junctional integrity of retinal pigment epithelial cells. *Invest Ophthalmol Vis Sci* 45: 675–684.
40. Hidalgo-de-Quintana J, Evans RJ, Cheetham ME, van der Spuy J (2008) The Leber congenital amaurosis protein AIPL1 functions as part of a chaperone heterocomplex. *Invest Ophthalmol Vis Sci* 49: 2878–2887.
41. Siu AW, Lau MK, Cheng JS, Chow CK, Tam WC, et al. (2008) Glutamate-induced retinal lipid and protein damage: the protective effects of catechin. *Neurosci Lett* 432: 193–197.
42. Fatma N, Kubo E, Sen M, Agarwal N, Thoreson WB, et al. (2008) Peroxiredoxin 6 delivery attenuates TNF-alpha-and glutamate-induced retinal ganglion cell death by limiting ROS levels and maintaining Ca2+ homeostasis. *Brain Res* 1233: 63–78.
43. Tulsawani R, Kelly LS, Fatma N, Chhunchha B, Kubo E, et al. (2010) Neuroprotective effect of peroxiredoxin 6 against hypoxia-induced retinal ganglion cell damage. *BMC Neurosci* 11: 125.
44. Hejtmancik JF (1998) The genetics of cataract: our vision becomes clearer. *Am J Hum Genet* 62: 520–525.
45. Deretic D, Aebbersold RH, Morrison HD, Papermaster DS (1994) Alpha A- and alpha B-crystallin in the retina. Association with the post-Golgi compartment of frog retinal photoreceptors. *J Biol Chem* 269: 16853–16861.
46. Vazquez-Chona F, Song BK, Geisert EE Jr. (2004) Temporal changes in gene expression after injury in the rat retina. *Invest Ophthalmol Vis Sci* 45: 2737–2746.
47. Sakaguchi H, Miyagi M, Darrow RM, Crabb JS, Hollyfield JG, et al. (2003) Intense light exposure changes the crystallin content in retina. *Exp Eye Res* 76: 131–133.
48. Barbe MF, Tytell M, Gower DJ, Welch WJ (1988) Hyperthermia protects against light damage in the rat retina. *Science* 241: 1817–1820.
49. Beckmann RP, Mizzen LE, Welch WJ (1990) Interaction of Hsp 70 with newly synthesized proteins: implications for protein folding and assembly. *Science* 248: 850–854.
50. Evans CG, Chang L, Gestwicki JE (2010) Heat shock protein 70 (hsp70) as an emerging drug target. *J Med Chem* 53: 4585–4602.
51. Whitlock NA, Lindsey K, Agarwal N, Grosson CE, Ma JX (2005) Heat shock protein 27 delays Ca2+-induced cell death in a caspase-dependent and -independent manner in rat retinal ganglion cells. *Invest Ophthalmol Vis Sci* 46: 1085–1091.
52. Rhee SG, Kang SW, Chang TS, Jeong W, Kim K (2001) Peroxiredoxin, a novel family of peroxidases. *IUBMB Life* 52: 35–41.
53. Chang TS, Jeong W, Choi SY, Yu S, Kang SW, et al. (2002) Regulation of peroxiredoxin I activity by Cdc2-mediated phosphorylation. *J Biol Chem* 277: 25370–25376.
54. Kubo E, Singh DP, Fatma N, Akagi Y (2009) TAT-mediated peroxiredoxin 5 and 6 protein transduction protects against high-glucose-induced cytotoxicity in retinal pericytes. *Life Sci* 84: 857–864.
55. De La Paz MA, Zhang J, Fridovich I (1996) Antioxidant enzymes of the human retina: effect of age on enzyme activity of macula and periphery. *Curr Eye Res* 15: 273–278.
56. Maier CM, Chan PH (2002) Role of superoxide dismutases in oxidative damage and neurodegenerative disorders. *Neuroscientist* 8: 323–334.
57. Organisciak DT, Darrow RM, Barsalou L, Darrow RA, Kutty RK, et al. (1998) Light history and age-related changes in retinal light damage. *Invest Ophthalmol Vis Sci* 39: 1107–1116.
